# Supplementary material for: In vivo imaging reveals independent intraflagellar transport of the nexin–dynein regulatory complex subunits DRC2 and DRC4
Source: PubMed Central journal article supplement — Mol Biol Cell. 2023 Jan 13;34(2):br2. doi: 10.1091/mbc.E22-11-0524 (PMC9930527; doi:10.1091/mbc.e22-11-0524), 2023-01-13

Supplementary Materials

*Molecular Biology of the Cell*

Saravanan *et al.*

## Supplementary materials

| CC number               | Genotype                                                       | Reference or source      |
|-------------------------|----------------------------------------------------------------|--------------------------|
| CC-5102 (wild-type, g1) | <i>nit1, agg1, mt</i> <sup>+</sup>                             | (Pazour et al., 1995)    |
| CC-5325 (wild-type)     | <i>cwl5, mt</i> <sup>-</sup>                                   | (Li et al., 2016)        |
| CC-124 (wild-type)      | <i>nit1, nit2, agg1, mt</i> <sup>-</sup>                       | (Proschold et al., 2005) |
| CC-125 (wild-type)      | <i>nit1, nit2, mt</i> <sup>+</sup>                             | (Proschold et al., 2005) |
| CC-3090                 | <i>ida6-1, mt</i> <sup>+</sup>                                 | (Kato et al., 1993)      |
| CC-4483                 | <i>pf2-4, 9b11, mt</i> <sup>-</sup>                            | (Rupp and Porter, 2003)  |
| CC-5510                 | <i>pf2-4, DRC4-mC-TG, mt</i> <sup>-</sup>                      | this study               |
| CC-4495                 | <i>ida6, DRC2-GFP-TG, mt</i> <sup>+</sup>                      | (Bower et al., 2018)     |
| CC-5514                 | <i>ida6-1, pf2-4, DRC2-GFP-TG</i>                              | this study               |
| CC-5515                 | <i>ida6-1, pf2-4, DRC4-mC-TG</i>                               | this study               |
| CC-5516                 | <i>pf2-4, ida6-1, DRC2-GFP-TG, DRC4-mC-TG, mt</i> <sup>-</sup> | this study               |
| CC-5517                 | <i>pf2-4, ida6-1, DRC2-GFP-TG, DRC4-mC-TG, mt</i> <sup>+</sup> | this study               |

Table S1) *Chlamydomonas* strains used in this study.

TG, transgene expressed from an ectopic locus; the TG designation and mating type were omitted in the main text and figures.

# Figure S1

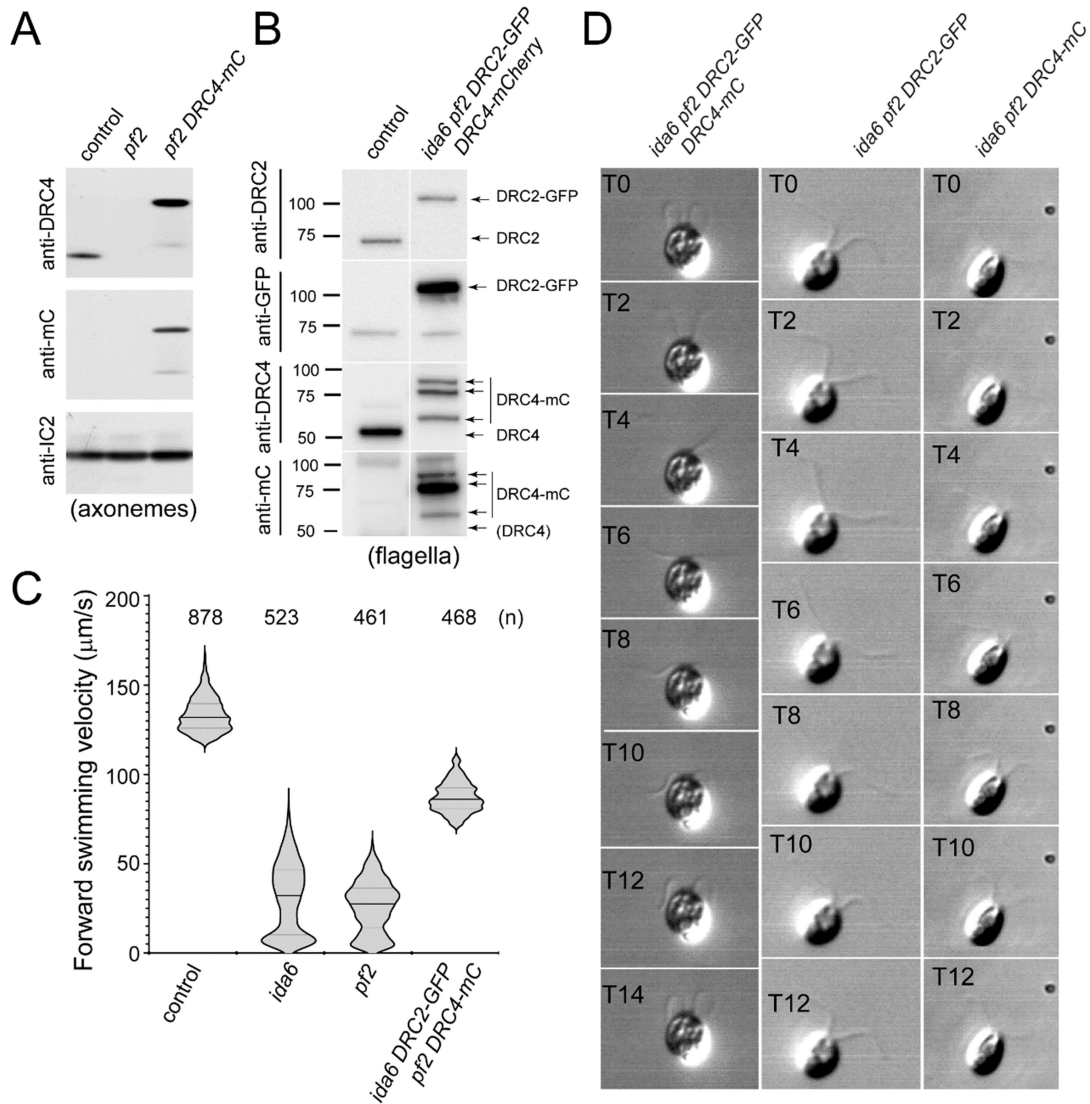

Figure S1) Loss of DRC4 severely impairs flagellar motion

A) Western Blot analyzing isolated axonemes of a wild-type control, *pf2*, and the *pf2 DRC4-mC* rescue strain with antibodies to DRC4 and mC; antibodies to IC2, an outer dynein subunit, were used to control for loading.

B) Western blot analyzing flagella isolated from wild-type (control; g1) and the *ida6 pf2 DRC2-GFP DRC4-mC* strain. Replicate membranes were stained with anti-DRC2 and anti-DRC4; anti-IC2 was used as a loading control. The positions of DRC2, DRC4, DRC2-GFP, DRC4-mC, and of a DRC4-mC fragment are indicated with arrows. Unrelated lanes were cropped. The DRC4-mC subunit often ran as three bands in flagellar samples, of which the middle one was the most prominent; this band was also the main target of anti-mC. Proteolysis of mC, which tends to fragment upon heating for SDS-PAGE, has been observed repeatedly (Gross et al., 2000). The origin of the larger immunoreactive band is unclear.

C) Violin plot showing the forward swimming velocity of wild-type, the *ida6* and *pf2* mutants, and *ida6 pf2 DRC2-GFP DRC4-mC* double-mutant-double-rescue strain. n, number of cells analyzed.

D) Still DIC images from highspeed recordings of *ida6 pf2 DRC2-GFP DRC4-mC*, *ida6 pf2 DRC2-GFP* and *ida6 pf2 DRC4-mC* cells. The time in ms is indicated. See related video 1.

## Figure S2

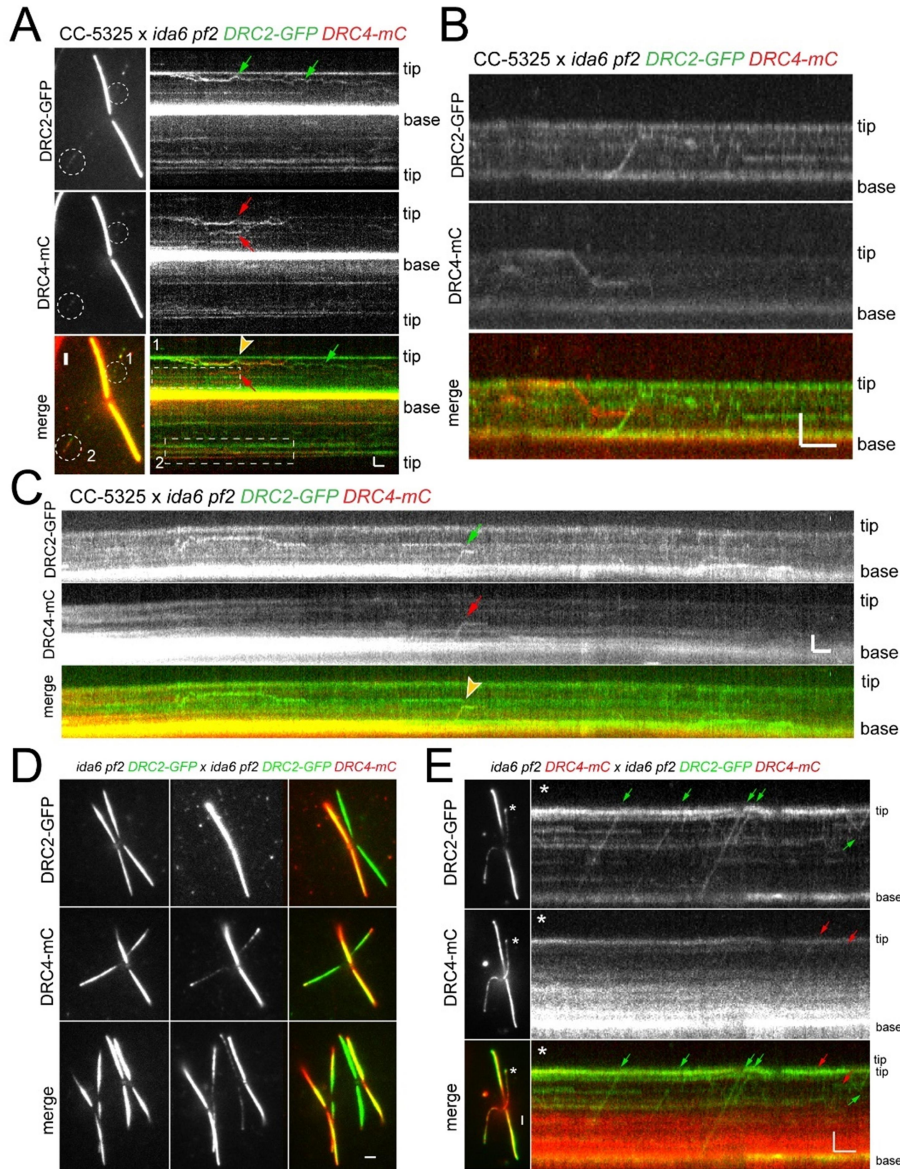

Figure S2) Analysis of DRC2-GFP and DRC4-mC transport in zygotic flagella.

A) Still images and kymographs of wild-type (CC-5325)  $\times$  *ida6 pf2 DRC2-GFP DRC4-mC* zygotes. Arrows mark trajectories resulting from diffusion of the tagged proteins; co-diffusion is marked by a yellow arrowhead. Bars = 2s and 2  $\mu$ m. Circles in the still images and boxed areas highlight stationary proteins indicative for association to the axoneme. Note distinct patterns of

stationary DRC2-GFP and DRC4-mC indicative for independent incorporation into the wild-type axonemes. Bars = 2s and 2  $\mu$ m.

B, C) Examples of independent transport (B) and co-transport (C) of DRC2-GFP and DRC4-mC. Bars = 2s and 2  $\mu$ m.

D, E) Still images (D, E) and kymograms (E) of zygotes obtained by mating *ida6 pf2 DRC2-GFP DRC4-mC* with either *ida6 pf2 DRC2-GFP* (D) or *ida6 pf2 DRC4-mC* (E). The star indicates the flagellum used for kymographic analysis. Bars = 2s and 2  $\mu$ m.

#### *Video S1) Flagellar motion analysis of DRC mutant and rescue strains*

The video shows cells of the *ida6 pf2 DRC2-GFP*, *ida6 pf2 DRC4-mC*, and the *ida6 pf2-4 DRC2-GFP DRC4-mC* strains recorded at 1,000 fps. The timer counts seconds.milliseconds.

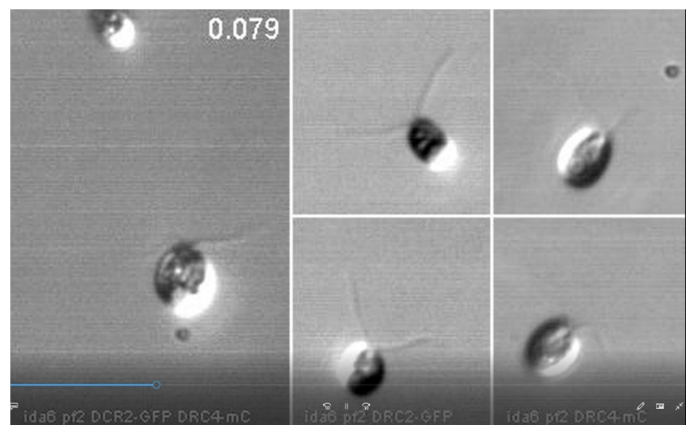

Supplement: mbc-34-br2-s001.pdf [file mbc-34-br2-s001.pdf]
